# Supplementary material
Source: publisher figshare collection journal article supplement (https://frontiersin.figshare.com/ndownloader/files/18035129)
Supplement: Supplementary file 1 [file 18035129]

Supplementary Material

# Supplementary Figures and Results


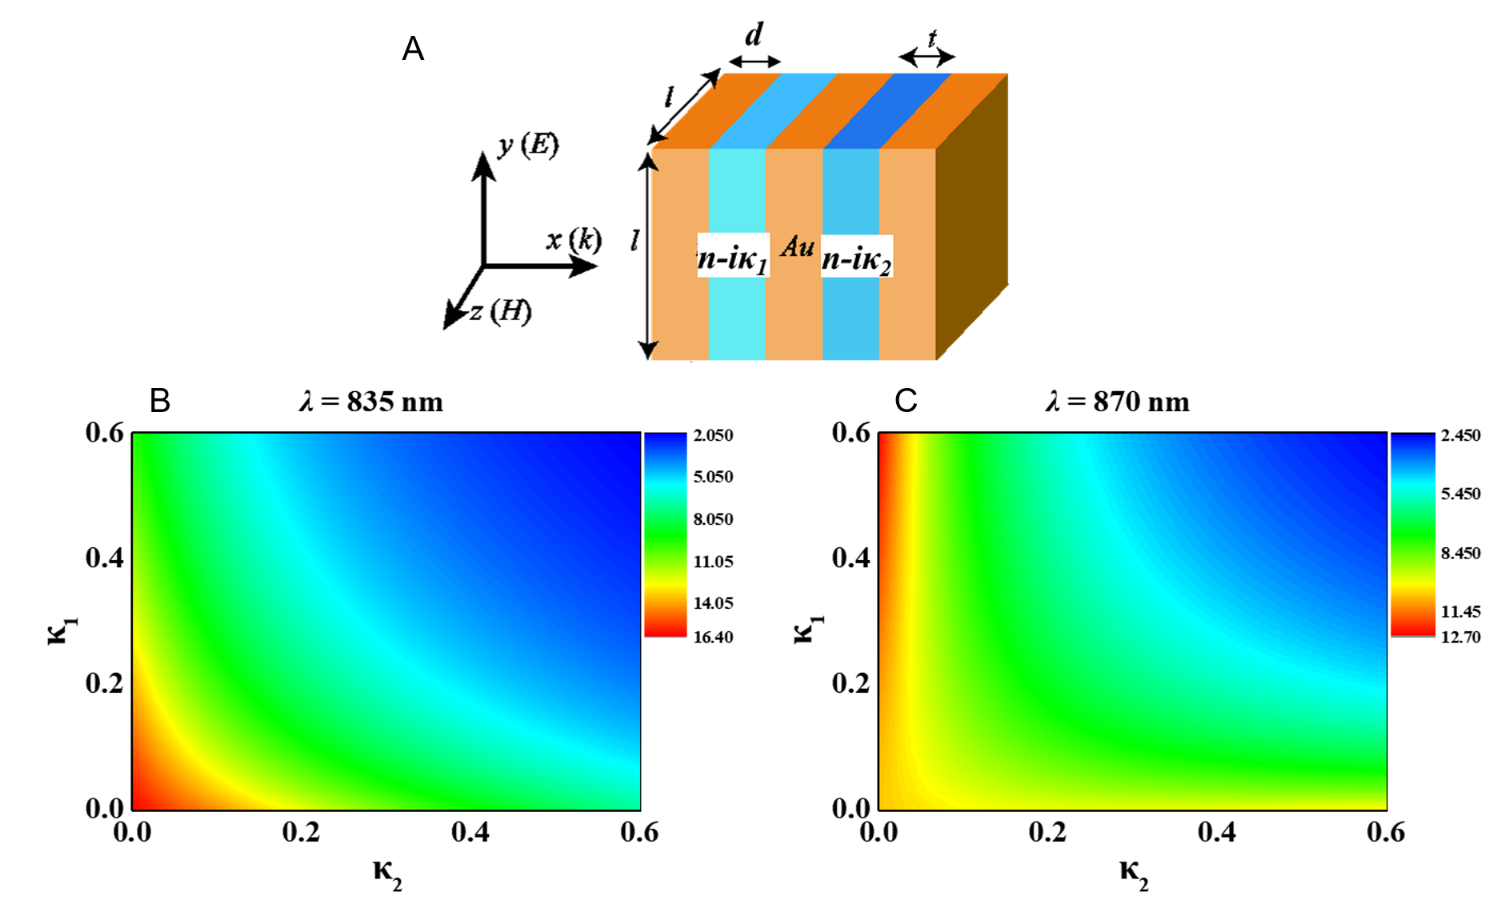


**Supplementary Figure S1.** Unidrectional scattering produced by the five-layer plasmonic nanoantenna with two different gain materials. (A) Schematic of the five-layer plasmonic nanoantenna, composed of planar metallic strips separated by two materials with different amount of gains, and . (B) The forward to backward ratioas a function ofand atnm. (C)as a function of and atnm.

In order to explore more scattering properties of the PT-symmeric systems, we investigated a series of five-layer plasmonic nanoantennas.

In Figure S1A, we show a five-layer plasmonic nanoantenna, composed of planar metallic strips separated by two materials with different amount of gains, *n-iκ*1 and *n-iκ*2. The incident plane electromagnetic wave and geometric parameters (*l*, *d*, *t*) of this structure are consistent with the *PT*-symmeric structure as mentioned above. The gain parameters, *κ*1 and *κ*2 are changed from 0 to 0.6, respectively. The forward to backward ratio *G* is calculated for each pair of *κ*1 and *κ*2 at wavelength of 835 nm and 870 nm, as shown in Figure S1B and S1C.

The contour graphs of *G* verus non-Hermiticity parameters (*κ*1 and *κ*2) at 835 nm and 870 nm are similar. All the *G* values at each pair of *κ*1 and *κ*2 are greater than zero, which means the unidirectivity is always positive in this system with two different gain materials. This unidirectivity can be explained by first Kerker condition too. With the *κ*1 and *κ*2 increasing, *G* is decreased. Therefore, the max value of *G* is located in *κ*1 = *κ*2 = 0. The reason of this trend may be caused by the MD change with *κ*1 and *κ*2. It’s harder to satisfy first Kerker condition with the MD changing, so the undirectivity is steadily weakening.


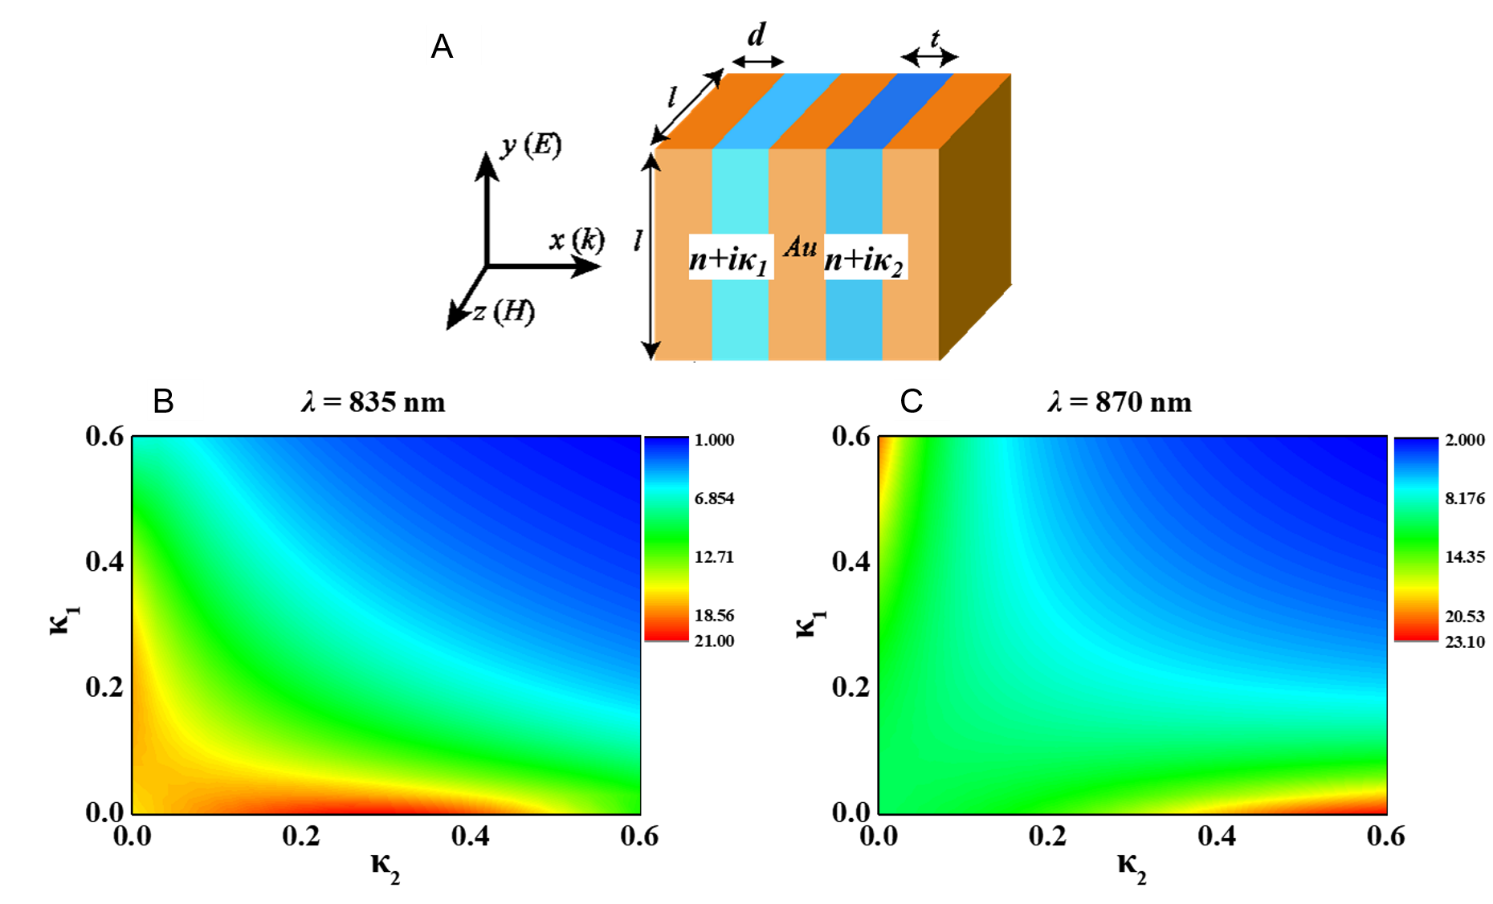


**Supplementary Figure S2.** Unidrectional scattering produced by the five-layer plasmonic nanoantenna with two different loss materials. (A) Schematic of the five layered plasmonic nanoantenna, composed of planar metallic strips separated by two materials with different amount of losses, and . (B) The forward to backward ratioas a function ofand atnm. (C)as a function of and atnm.

In Figure S2A, we show a five-layer plasmonic nanoantenna, composed of planar metallic strips separated by two materials with different amount of losses, *n+iκ*1 and *n+iκ*2. The incident wave and structure parameters are consistent with the above one. The *κ*1 and *κ*2 are changed from 0 to 0.6, respectively. Forward to backward ratio *G* is also calculated for each pair of *κ*1 and *κ*2 at wavelength of 835 nm and 870 nm, as shown in Figures S1B and S1C. The contour graphs of *G* versus non-Hermiticity parameters (*κ*1 and *κ*2) at 835 nm and 870 nm are similar. In the system with two different loss materials, it’s also seen that all the *G* values at each pair of *κ*1 and *κ*2 are greater than zero, which means the unidirectivity is always positive. The positive unidirectivity is reached in this system, because the first Kerker condition is approximate satisfied. The differences between *G* values of differentmay be caused by the MD change which could result in the change of matching to first Kerker condition.


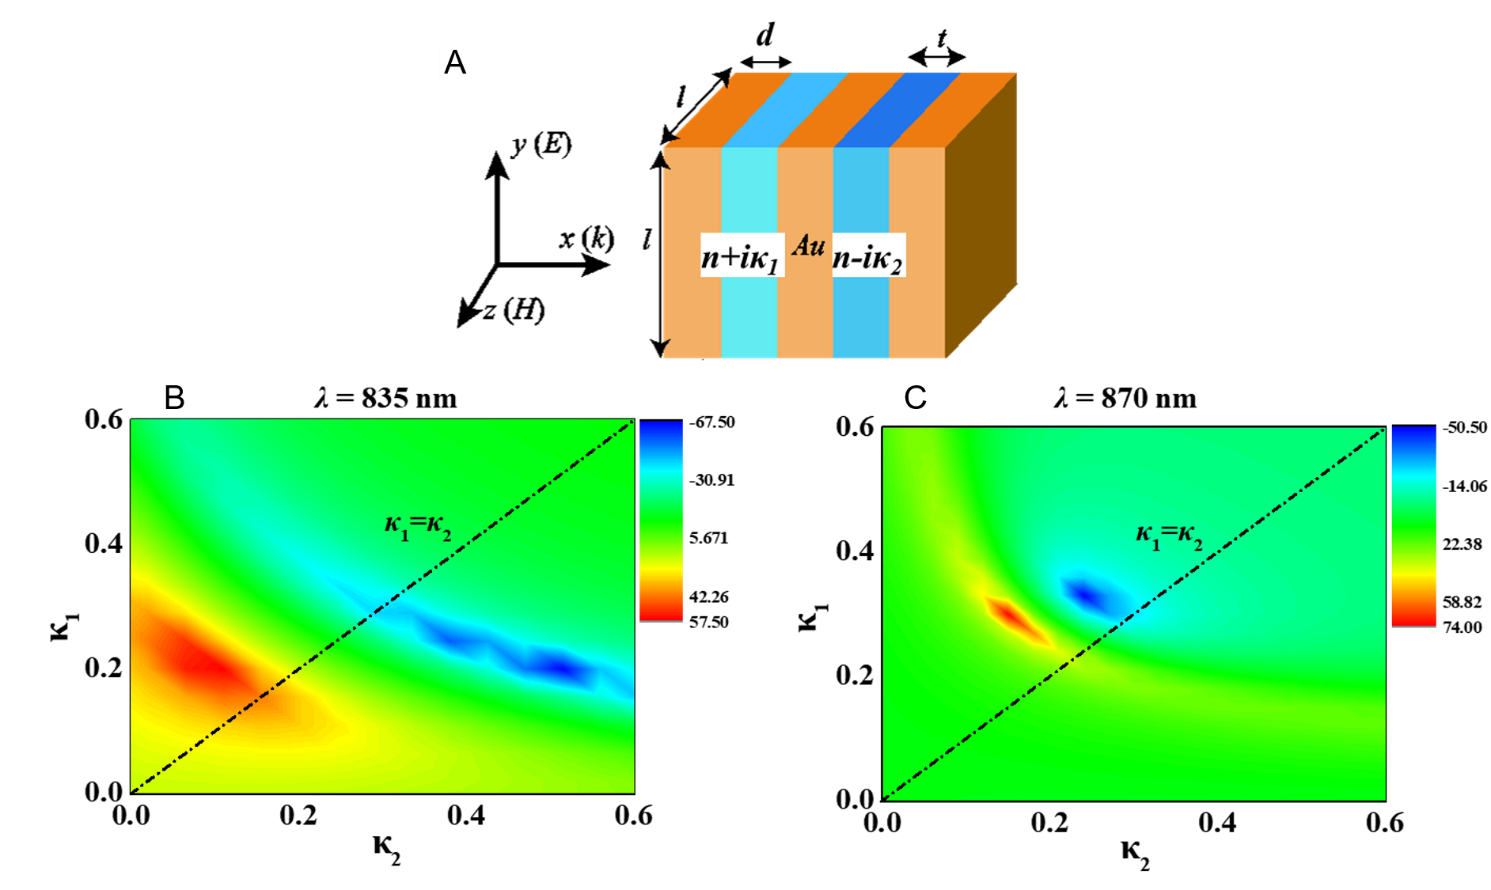


**Supplementary Figure S3.** Unidrectional scattering produced by the five-layer plasmonic nanoantenna with loss material and gain material. (A) Schematic of the five layered plasmonic nanoantenna, composed of planar metallic strips separated by gain (*n-iκ*1) and loss (*n+iκ*2) materials. (B) The forward to backward ratioas a function of *κ*1 and *κ*2 atnm. (C)as a function of *κ*1 and *κ*2 atnm.

The previous constructed *PT*-symmeric structure is also calculated with different gain (*n-iκ*1) and loss (*n+iκ*2) materials. As shown in Figure S3A, the five-layer plasmonic nanoantenna is composed of planar metallic strips separated by gain (*n-iκ*1) and loss (*n+iκ*2) materials. The *κ*1 and *κ*2 are changed from 0 to 0.6, respectively. The *G* values as function of *κ*1 and *κ*2 at *λ* = 835 nm and *λ* = 870 nm are calculated in Figures S3B and S3C. The dash dot line in Figures S3B and S3C means *κ*1 = *κ*2. In the contour graphs, it’s seen that *G* could reaches the peak (dip) at particular values of *κ*1 and *κ*2, but the values of *κ*1 and *κ*2 at peak (dip) are not equal. For example, *κ*1 = 0.2 and *κ*2 = 0.1 at the peak, *κ*1 = 0.2 and *κ*2 = 0.5 at the dip, for *λ* = 835 nm as shown in Figure S3B. As shown in Figure S3B for *λ* = 870 nm, *κ*1 = 0.3 and *κ*2 = 0.15 at the peak, *κ*1 = 0.33 and *κ*2 = 0.24 at the dip. In the *PT*-symmeric structure with *κ*1 = *κ*2 = *κ*, as shown in Figures S3B and S3C, it’s seen that for nm, *G* reaches the peak (dip) when *κ* = 0.14 (*κ* = 0.34). Similarity, it is seen that fornm, *G* reaches the peak (dip) when *κ* = 0.21 (*κ* = 0.3). These results are coincident with the results of the original manuscript in Figure 4.


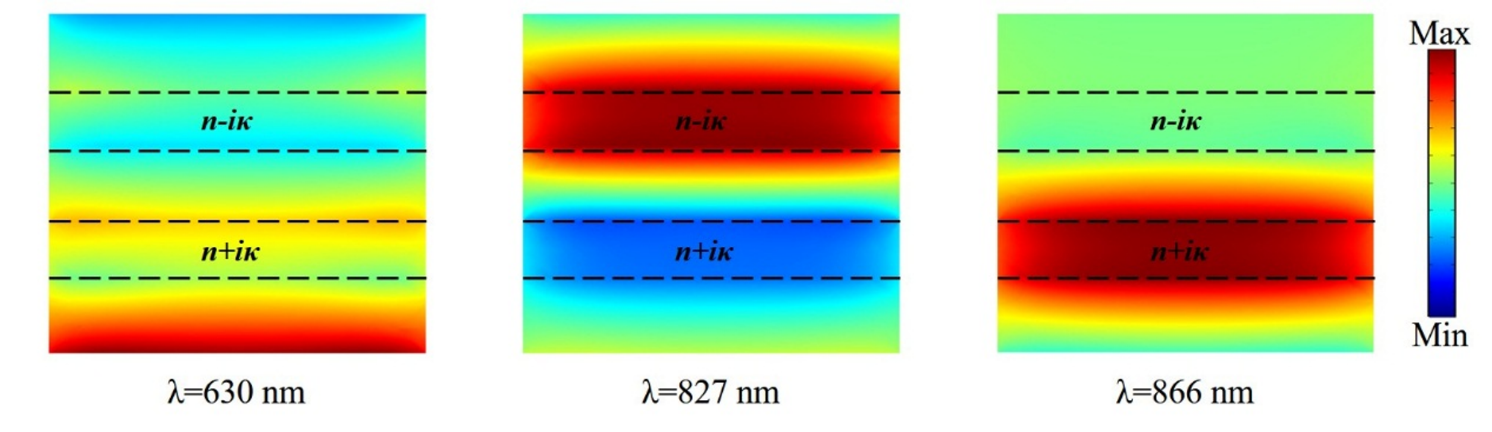


**Supplementary Figure S4.** Near field distribution for different modes when *κ* = 0.25

In our system, by increasing the amount of loss and gain in the system, we have observed the splitting of the mode in the longer wavelength (see Figure1C) and it suggests that one of the eigenmodes that is dark ( nm) and not excited in the case of the passive system becomes bright when bringing loss and gain in different dielectric layers. In order to investigate the presence of critical point, we describe state coalescence and power flow along the waveguide. Since the nanoantenna’s total thickness is far less than the working wavelength, we can regard the resonance caused by interfering SPP waves of in-plane wave vector *k* in all layers. As a result, the presence of the critical point and phase transition can be explained in ref. 47.

First, we begin by arranging Maxwell’s equation in Hamiltonian format, to make them more suitable for a perturbational analysis. We focus on TM modes, though the results can be readily extended to more general hybrid modes. Assuming no spatial variation along y, the TM modes have only (*Ex*, *Ez*, *Hy* ) nonzero field components and are described by

. (2)

Here,

(3)

and

. (4)

Defining

(5)

one can rewrite Eq.(2) in Dirac notation as

. (6)

For waveguide modes of the system that vary as , the propagation constant of *kz* and the spatial distribution are given by

. (7)

As a final application of our Hamiltonian formulation, we describe state coalescence and power flow along the waveguide. As described before, is Hermitian at *κ* = 0, so the modes of the lossless waveguide form an orthogonal, complete basis which can be used to find the equivalent matrix representation of any general Hamiltonian in Eq. (7). If represents the nth eigenvector of the Hermitian case (*κ* = 0) the matrix elements of in this basis are given by . Here, we consider only two eigenvectors of thelossless waveguide (i.e., the ones that will merge together). However, it should be noted that the below formalism is still applicable if more modes are considered.

The general Hamiltonian of a *PT* system in the basis of can be written as

, (8)

where *kz*1 and *kz*2 are the propagation constants of the lossless waveguide, κ is the non-Hermiticity parameter, and δ is the overlap integral. Note that the diagonal elements of the second matrix in Eq. (8) vanishes, resulting from the symmetry of the lossless modes described before. Also, due to the orthogonality of the lossless modes, is an identity matrix. So according to Eq. (7), the eigenvalues of the matrix in Eq. (8) are indeed the propagation constants of the modes in a *PT*‑symmetric waveguide with non-Hermiticity parameter *κ*. The eigenvalues are given by

. ( 9)

For a small non-Hermiticity parameter, where directly obtained from perturbation theory. However, this equation is more general and valid even for large values of *κ*. From Eq. (9), one can observe that the two roots become the same when , hence the formation of an critical point.


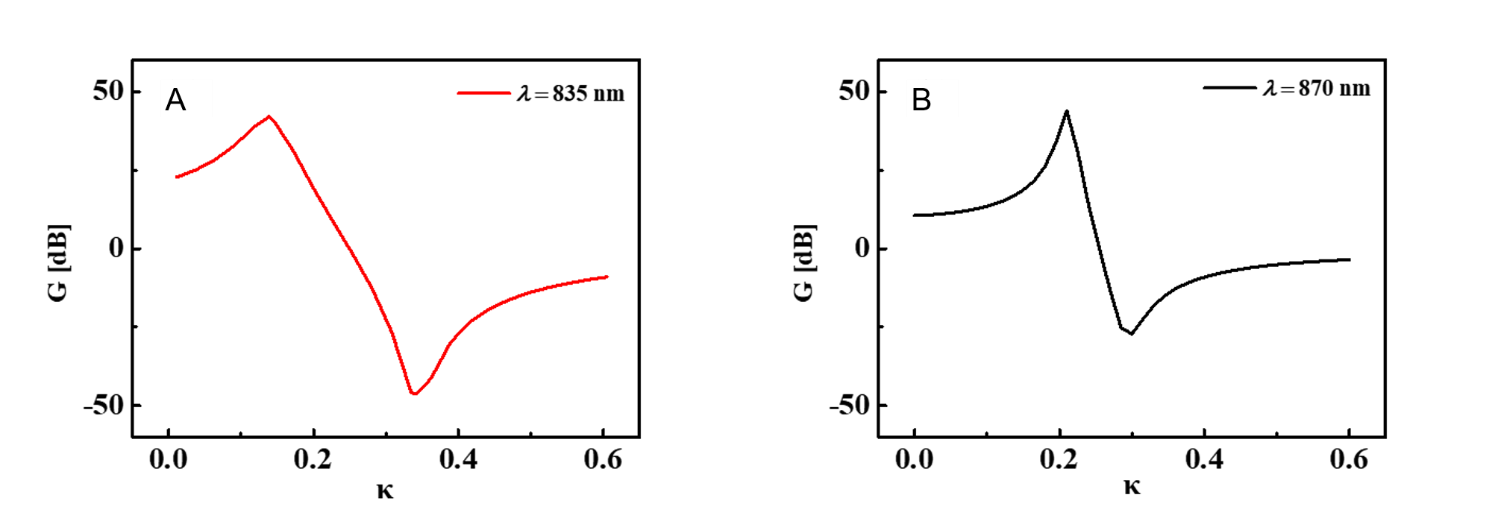


**Supplementary Figure S5.** Unidrectional scattering produced by the *PT*-symmeric structures with negative incidence direction (-*x* direction, from right to left) The forward to backward ratioas a function ofand the wavelength. (A)as a function of atnm. (B)as a function of atnm.

In consideration of that the system with loss and gain are generally asymmetric with respect to the direction of incidence, the scattering properties in negative incidence direction (-*x* direction, from right to left) are simulated in Figure S5. The forward-backward ratio *G* means the ratio of -*x* direction scattering energy to +*x* direction scattering energy in this case. The forward-backward ratio *G* versus non-Hermiticity parameter *κ* at nm andnm are shown in Figures S5A and S5B, respectively.

It is seen that G reaches the peak (dip) of +40 dB (-46 dB) when () at nm. Similarity, G reaches the peak (dip) of +44 dB (-27 dB) when () at nm. The absolute values of these results are smaller than the results (peak of +41 dB and dip of -47 dB at nm, peak of +49 dB and dip of -51 dB at nm) with positive incidence direction (+*x* direction, from left to right) in Figure 4. It can be explained by analyzing physical processes, in the case of a layered medium composed of metal-gain dielectric-metal-loss dielectric-metal (MGMLM). The light having passed through the first metal layer will experience first reflection from the middle metal layer and pass back through the front metal layer. The presence of gain in the dielectric will contribute to its amplification. It will be also a second a rear reflection from the rear metal layer, which will highly attenuated both by the passage through middle metal layer as well as the absorption in the lossy dielectric layer. By consequence, only a very small amount of the light reflected from the rear layer will contribute to the total reflection of the structure. For the very high loss level in dielectric layer the reflection from the rear layer is vanishing. The situation will be different in the case of MLMGM arrangement. As evident, the amount of light reflected from the middle metal layer will be much lower as compared with MGMLM arrangement. While for the reflection from the rear metal layer, the intensity transmitted through the middle layer is obviously lower as compared to the MGMLM case. By consequence lower reflection and stronger absorption should be expected in MLMGM case as compared to MGMLM one.


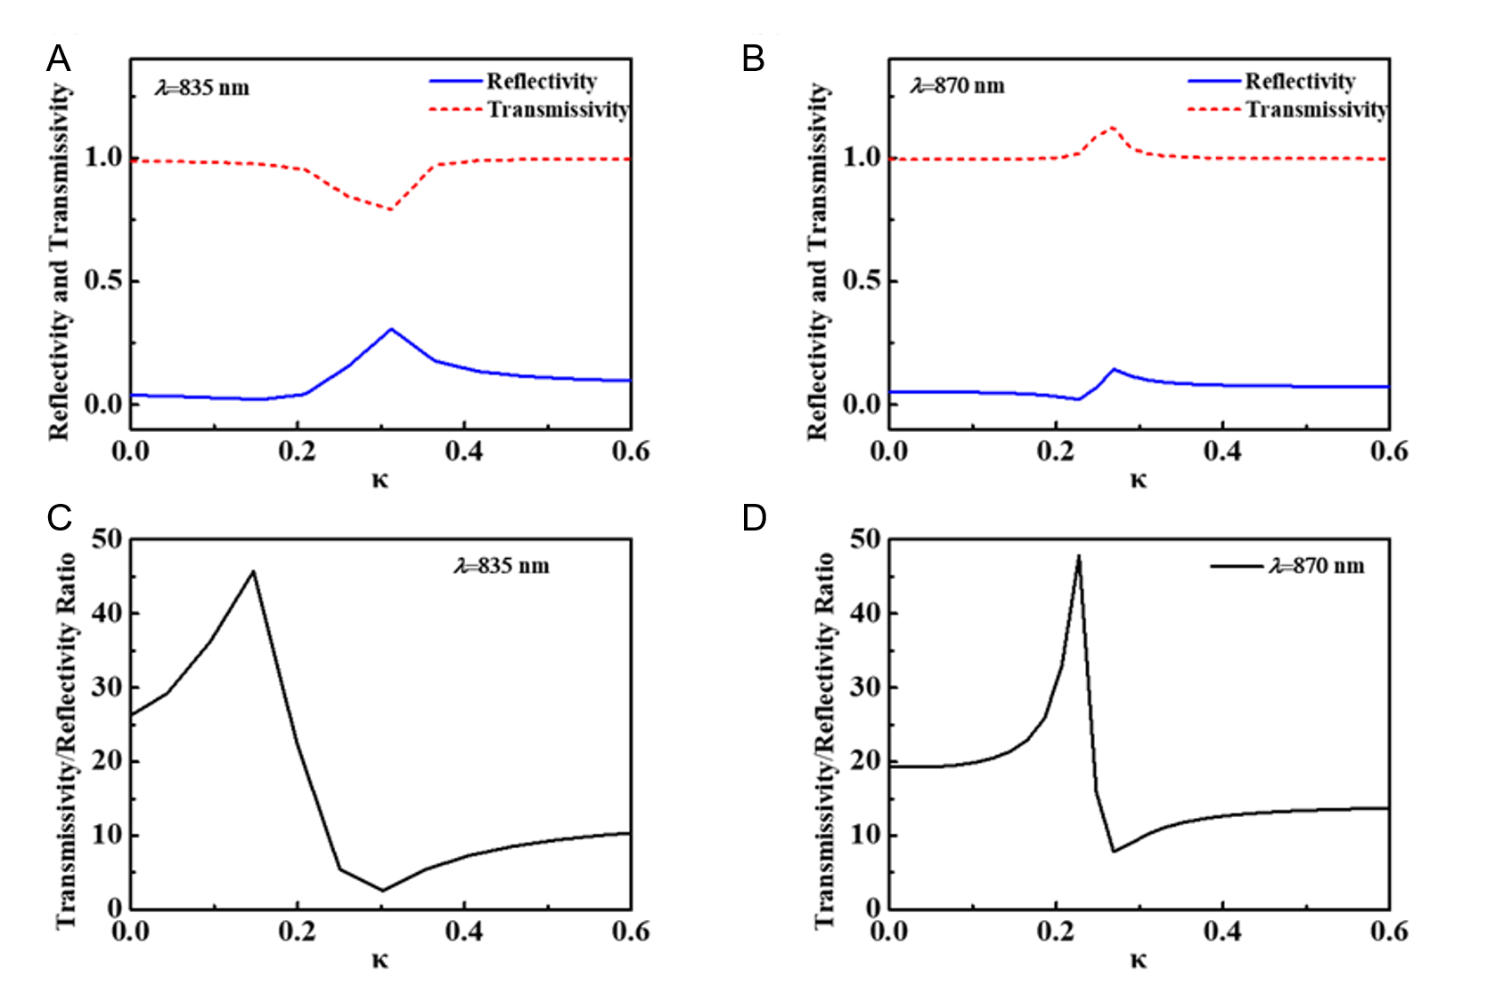


**Supplementary Figure S6.** Transmission and reflection properties of the *PT*-symmeric structure. Reflectivity and transmissivity of the *PT*-symmeric structure by plane wave incidence at *λ* = 835 nm (A) and *λ* = 870 nm (B). The Ratio of transmissivity to reflectivity at *λ* = 835 nm (C) and *λ* = 870 nm (D).

The transmission and reflection properties of the *PT*-symmeric structure are simulated in plane wave incidence at *λ* = 835 nm and *λ* = 870 nm. In Figures S6A and S6B, we show the reflectivity and transmissivity as functions of non-Hermiticity parameter *κ* at *λ* = 835 nm and *λ* = 870 nm, respectively. Then the ratios of transmissivity to reflectivity are calculated and plotted in Figures S6C and S6D. As shown in Figure S6A, the reflectivity values stay in low and transmissivity values stay in high except for *κ* = 0.2 to 0.4. Because the simulation of transmission and reflection properties is in free space, the most of energy is transmitted between two ports. Only a small amount of electromagnetic waves interact with nanoantenna, which generate abnormal transmission and reflection at some wavelengths and values of *κ*. There is a peak of reflectivity and a dip of transmissivity for *κ* = 0.31 at *λ* = 835 nm. As the ratio of transmissivity to reflectivity, there is a peak at *κ* = 0.15 and a dip at *κ* = 0.31 in Figure S6C. These results agree well with the peak (*κ* = 0.14) and dip (*κ* = 0.34) of *G* shown in Figure 4B. The difference may be caused by the boundary condition setting of reflection/transmission simulation. For *λ* = 870 nm in Figure S6B, there is a dip of reflectivity at *κ* = 0.23. Unlike Figure S6A, there is a peak of transmissivity at *κ* = 0.28, which could be result from the effect of gain material. As shown in Figure S6D, there is a peak at *κ* = 0.23 and a dip at *κ* = 0.28, which correspond to the peak (dip) of *G* (peak at *κ* = 0.21 and dip at *κ* = 0.3) in Figure 4C. Therefore, the positive and negative unidirectivities are related to transmission and reflection enhancements.


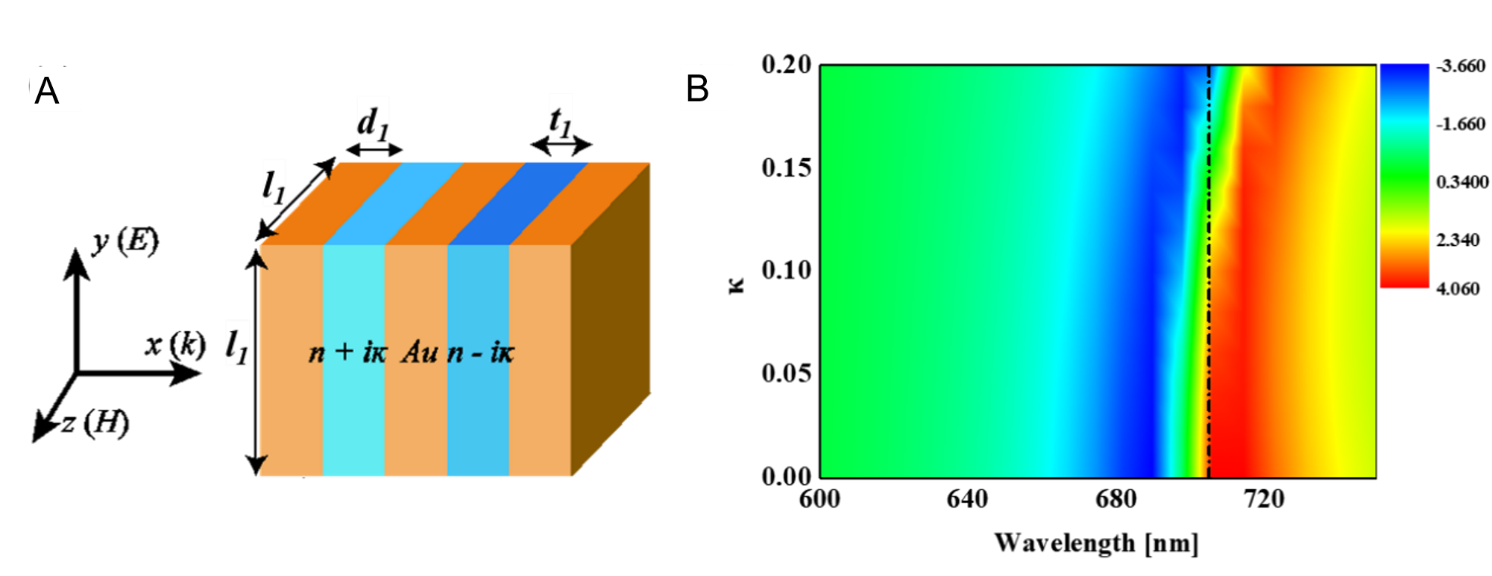


**Supplementary Figure S7.** Unidrectional scattering produced by the five-layer plasmonic nanoantenna with low loss material and gain material. (A) Schematic of the five layered plasmonic nanoantenna, composed of planar metallic strips separated by low gain *n-iκ* and low loss *n+iκ* materials. (B) The forward to backward ratioas a function ofand wavelength.

Considering low values of non-Hermiticity parameter, we redesigned a five-layer plasmonic nanoantenna with the geometric parameters (*l*1 = 30 nm, *d*1 = 8 nm, *t*1 = 6 nm), as shown in Figure S7A. The incident plane electromagnetic wave and surrounding condition of this system are consistent with the *PT*-symmeric system as mentioned above. The forward to backward ratio *G* is plotted in Figure S7B as a function of wavelength *λ* and non-Hermiticity parameter *κ*. The *G* values can be positive and negative in different *λ* and *κ*. As shown in Figure S7B, the *G* change from positive to negative when *κ* increased at *λ* = 705 nm (black dash dot line). Therefore, we can change the direction of unidirectivity (the sign of *G*) at the same wavelength by tuning *κ* in a small range from 0 to 0.2. From another point of view, we can reach different directions of unidirectivity at different wavelengths with a fixed low value of *κ*. For an available gain material with the *κ* ≤ 0.2, the tunable unidirectivity could also be realized in designed structure. In addition, the structure parameters could be further optimized to obtain excellent performance, and we will research more about it in the following work.
